# Supplementary material
Source: PubMed Central journal article supplement (PMC5501767)

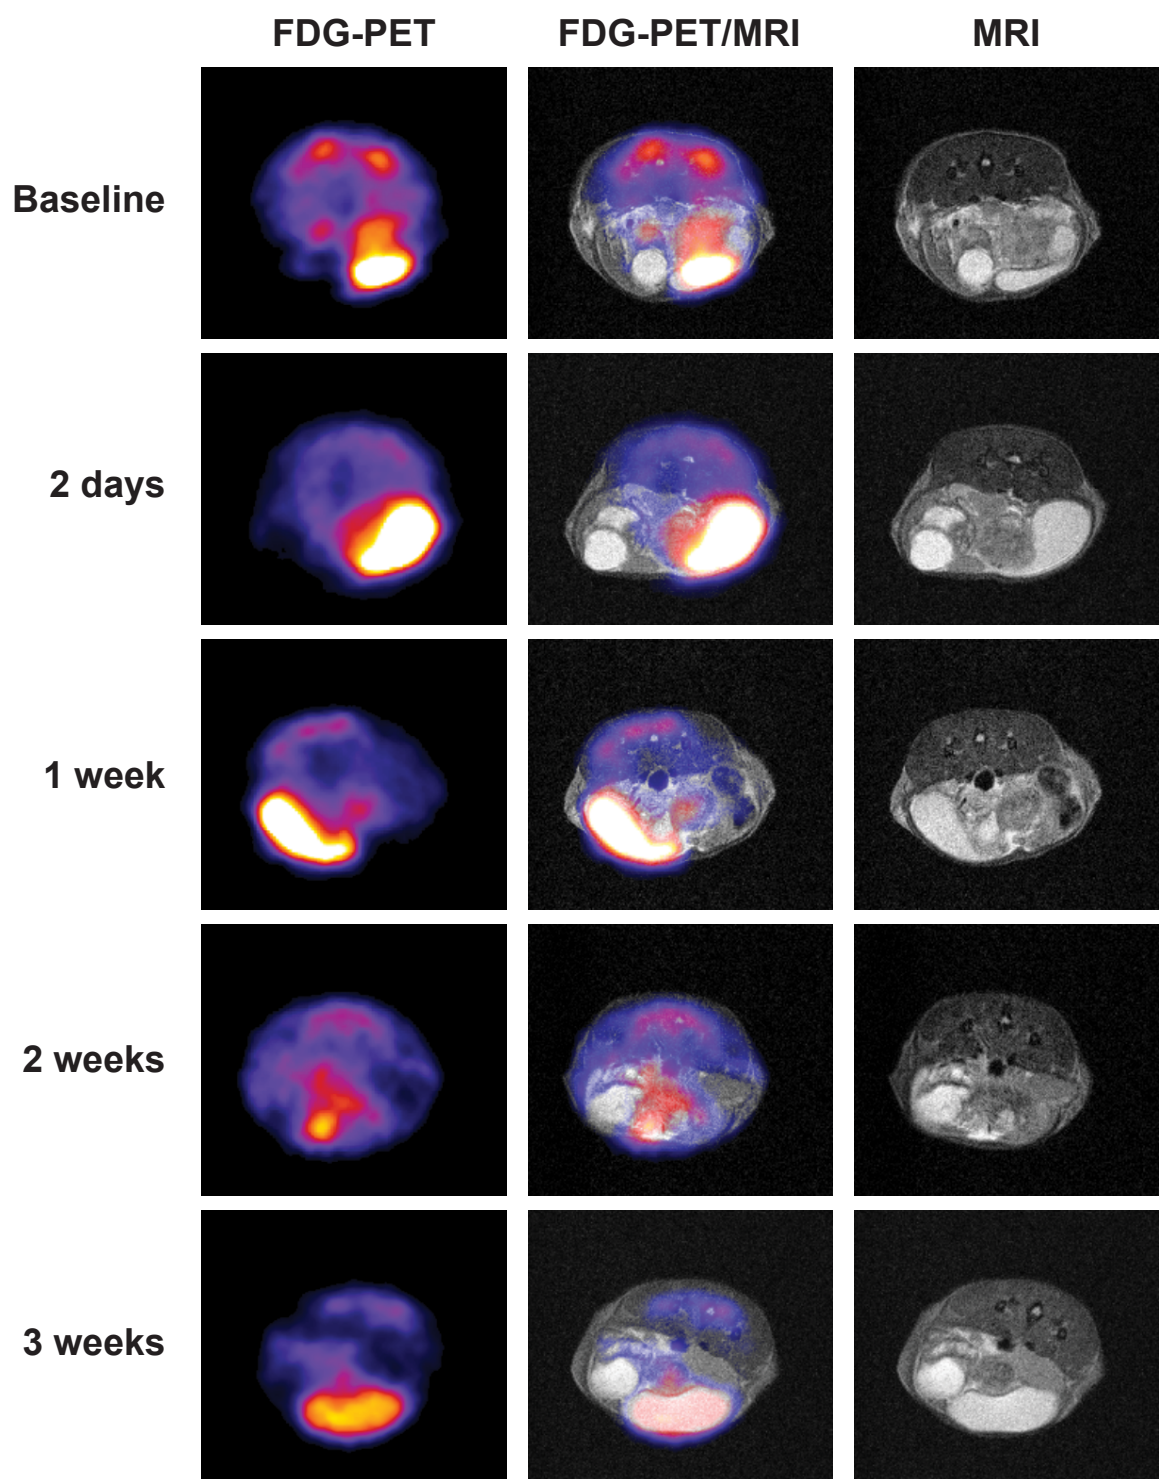

Supplementary Figure 1

Supplement: NIHMS859930-supplement-2.pdf [file NIHMS859930-supplement-2.pdf]

**a**

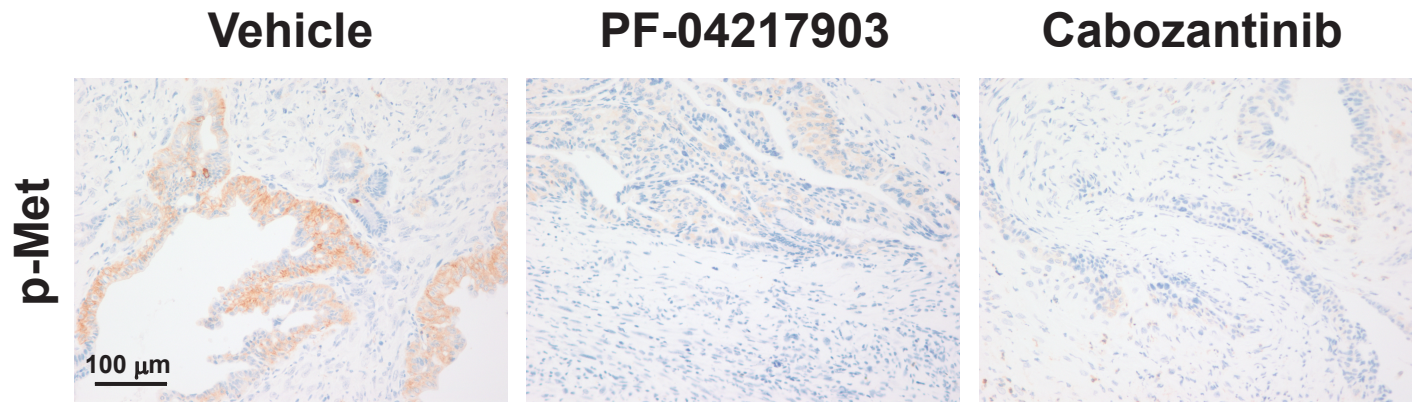

**b**

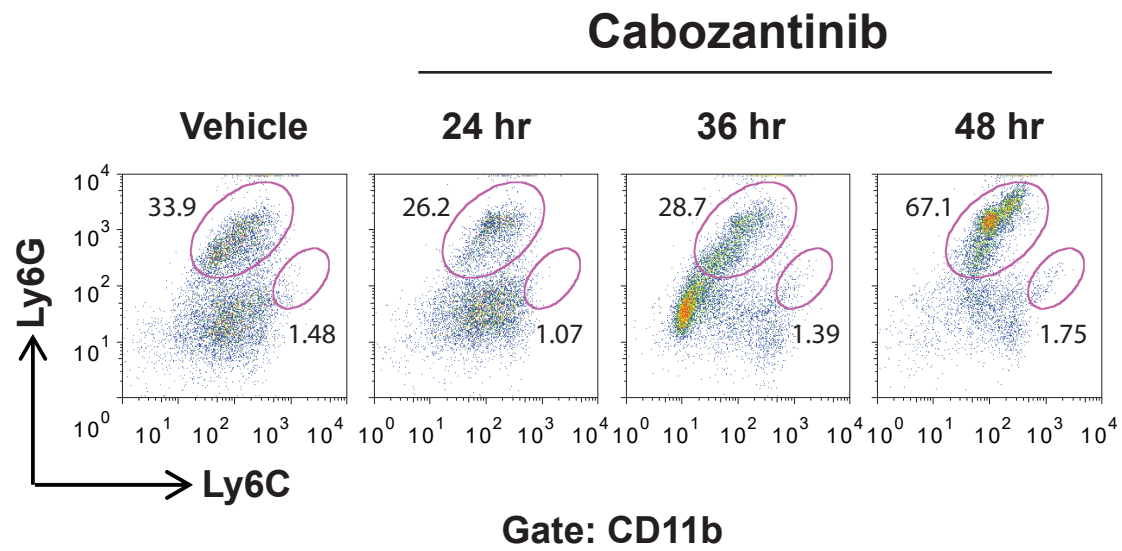

Supplement: NIHMS859930-supplement-3.pdf [file NIHMS859930-supplement-3.pdf]

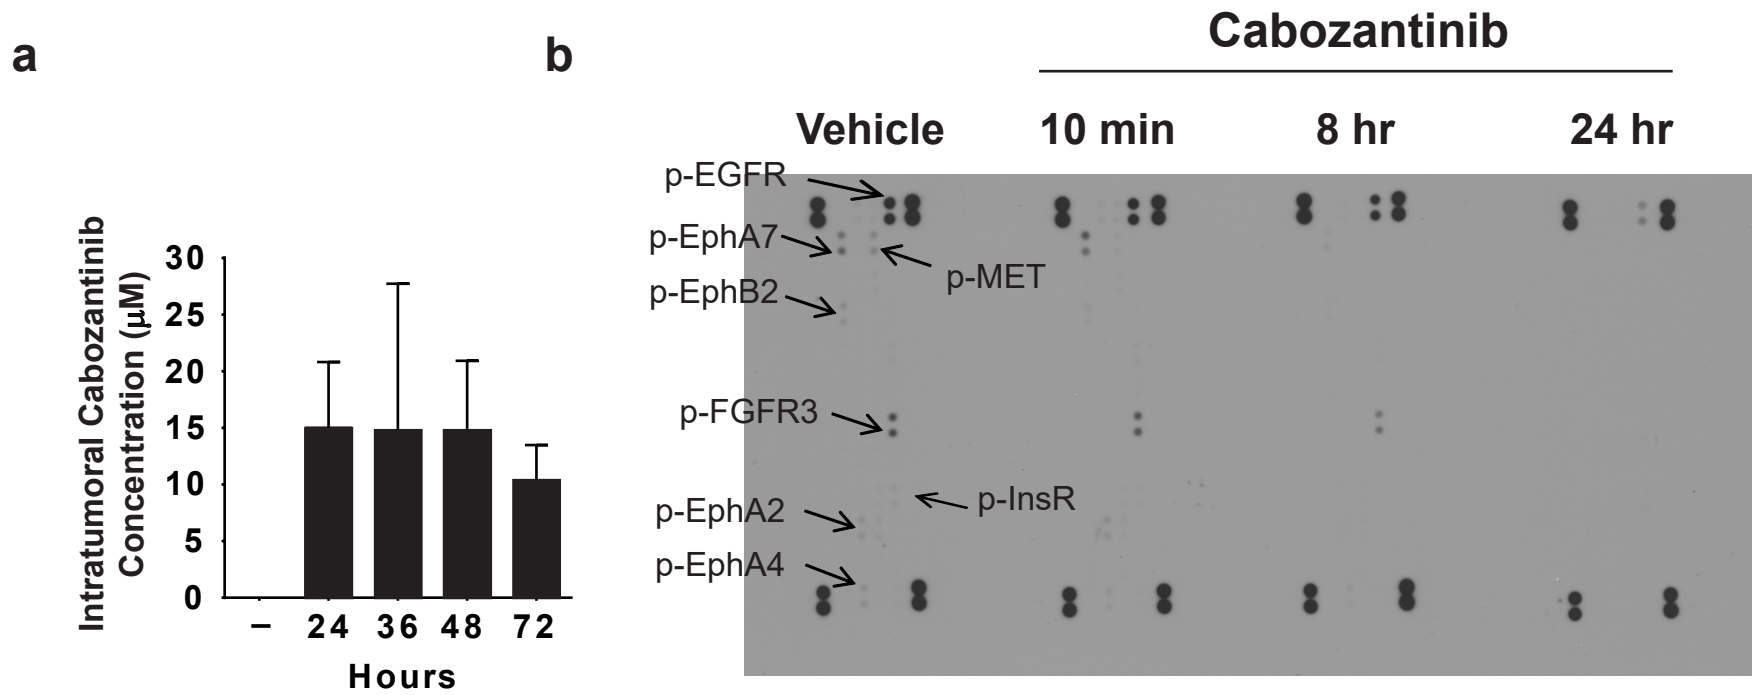

Supplementary Figure 3

Supplement: NIHMS859930-supplement-4.pdf [file NIHMS859930-supplement-4.pdf]

a

Vehicle

Cabozantinib

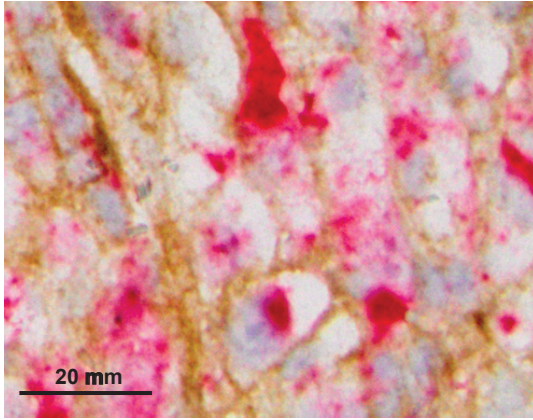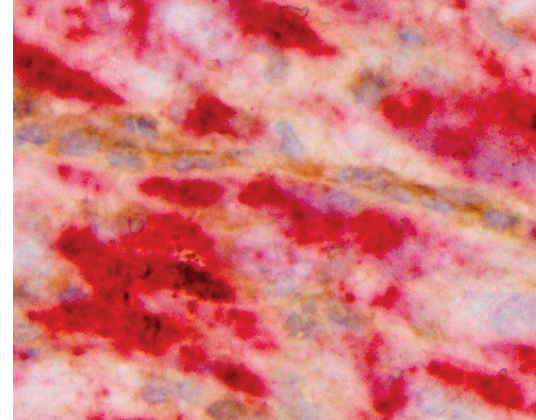

CXCL12 RISH  
 $\alpha$ PTEN IHC

b

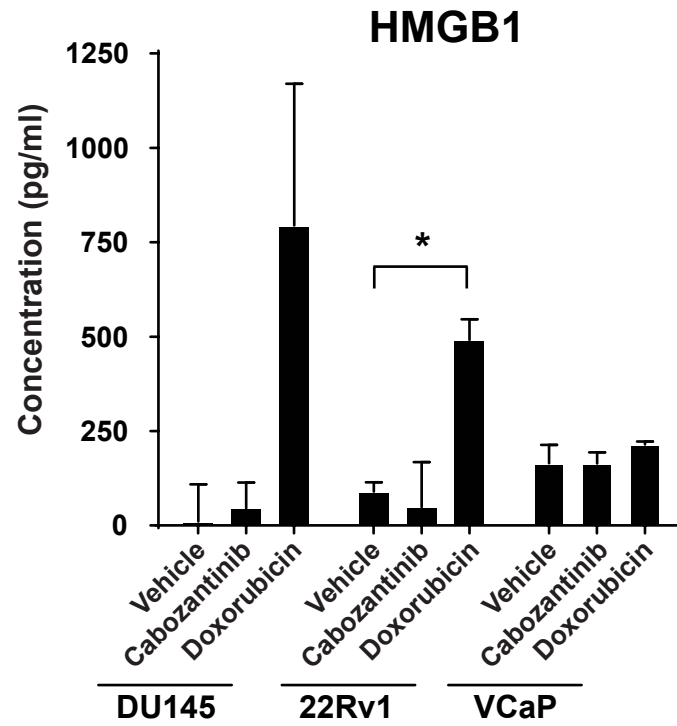

Supplement: NIHMS859930-supplement-5.pdf [file NIHMS859930-supplement-5.pdf]

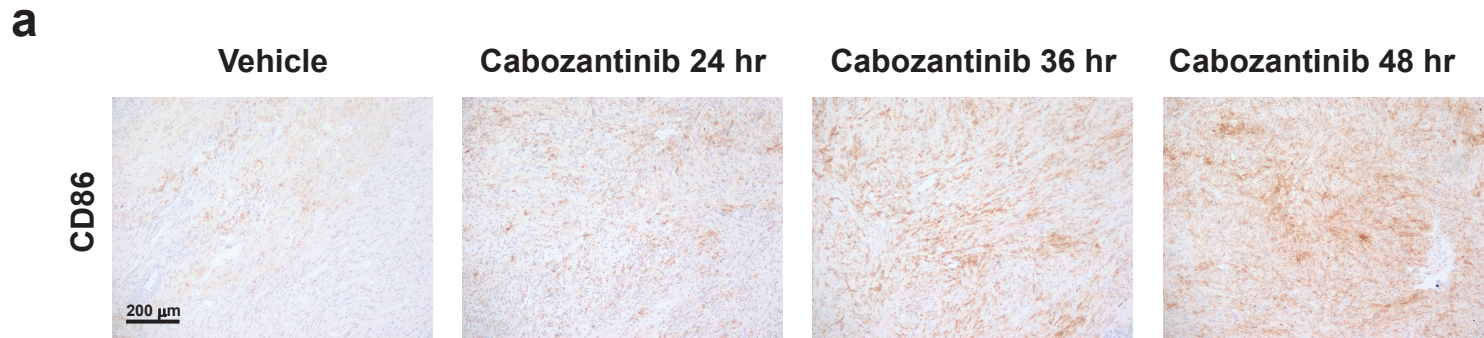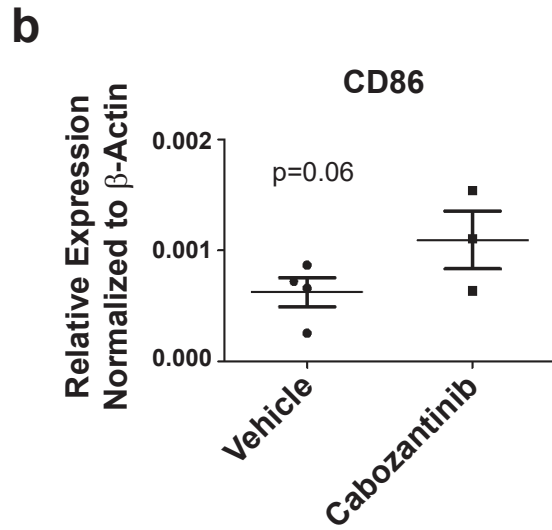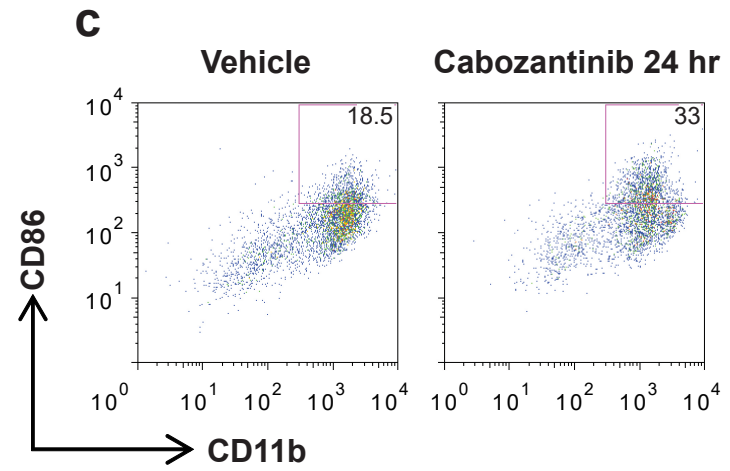

Supplementary Figure 5

Supplement: NIHMS859930-supplement-6.pdf [file NIHMS859930-supplement-6.pdf]

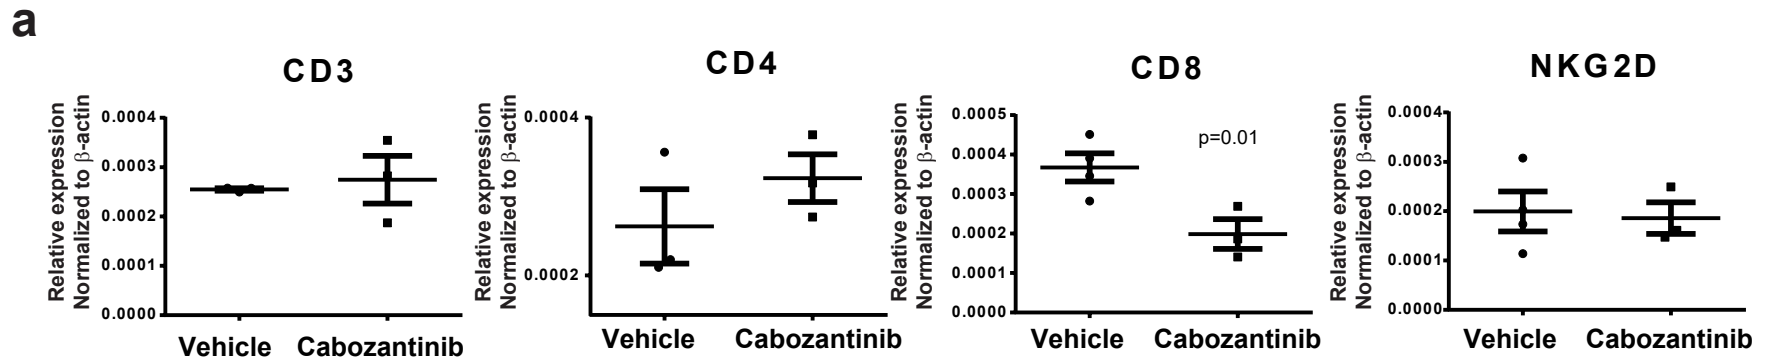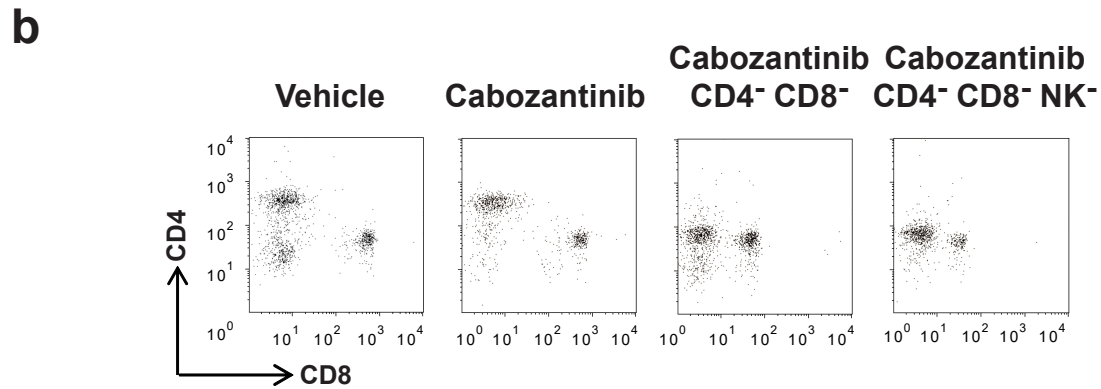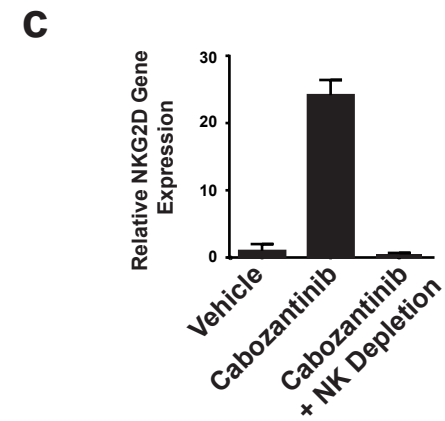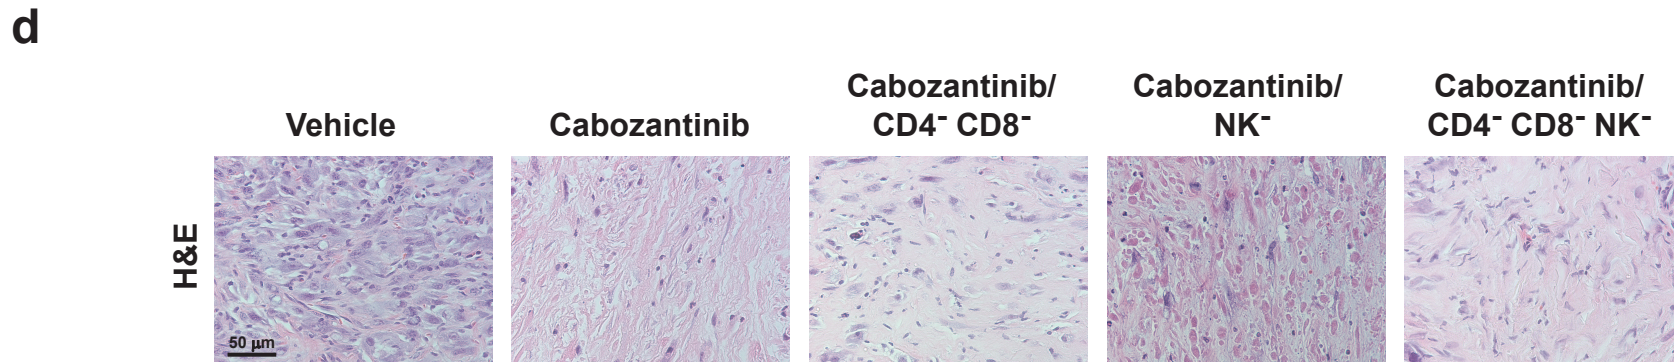

Supplementary Figure 6

Supplement: NIHMS859930-supplement-7.pdf [file NIHMS859930-supplement-7.pdf]

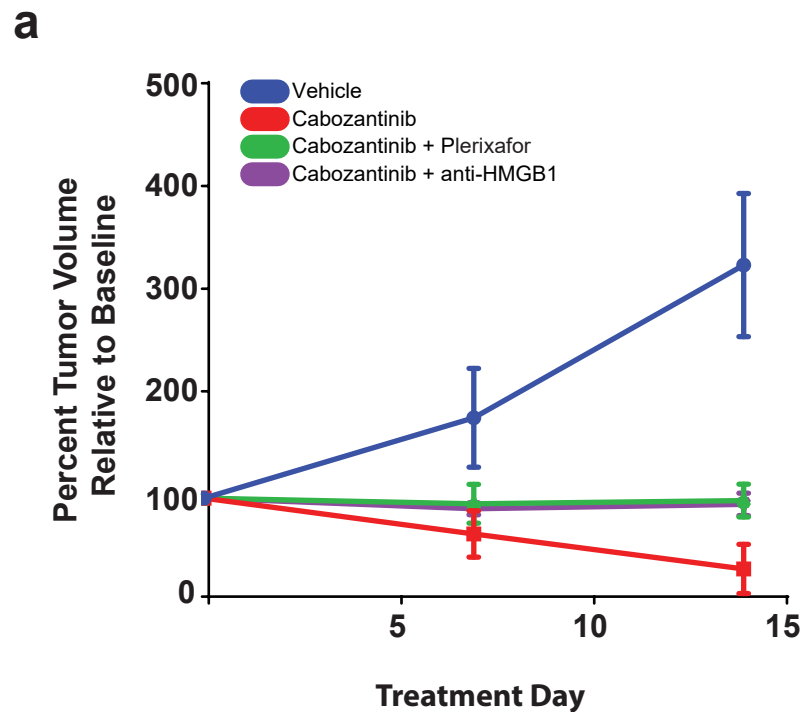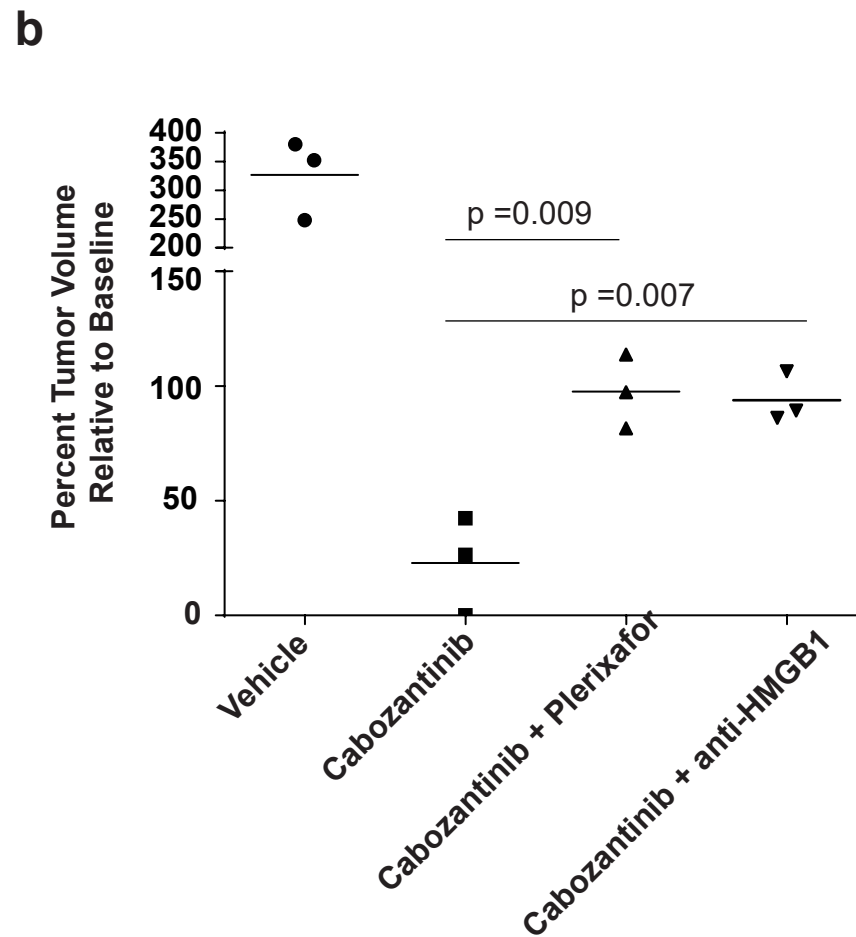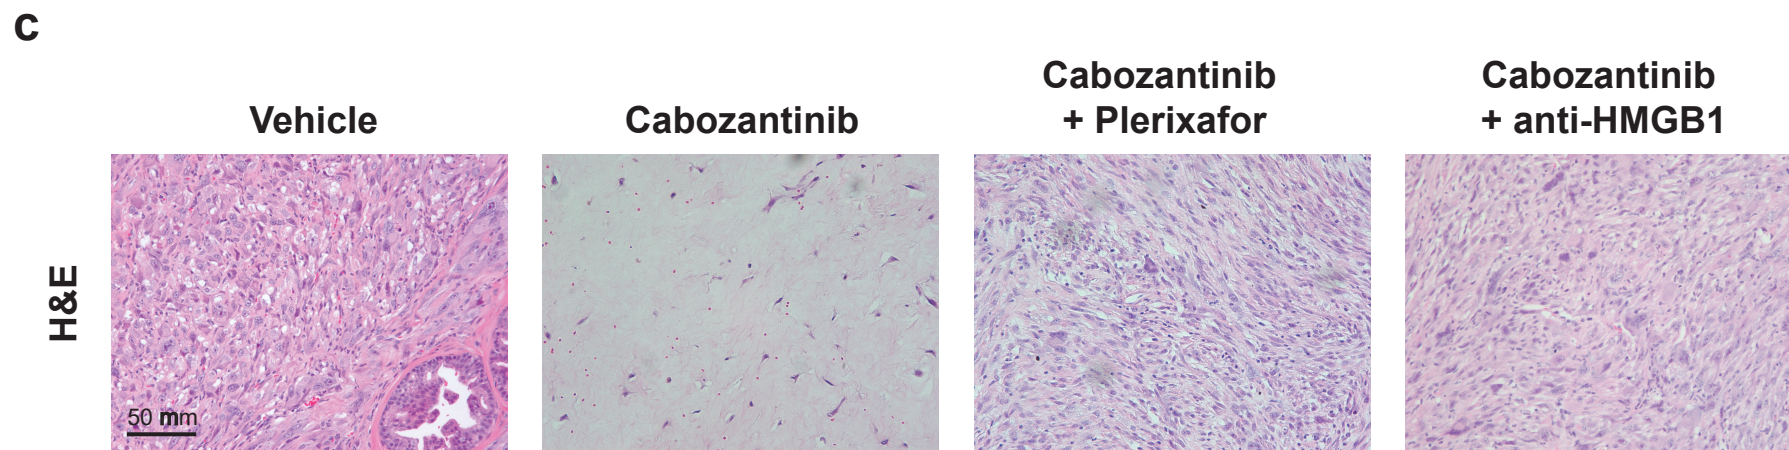

Supplement: NIHMS859930-supplement-8.pdf [file NIHMS859930-supplement-8.pdf]

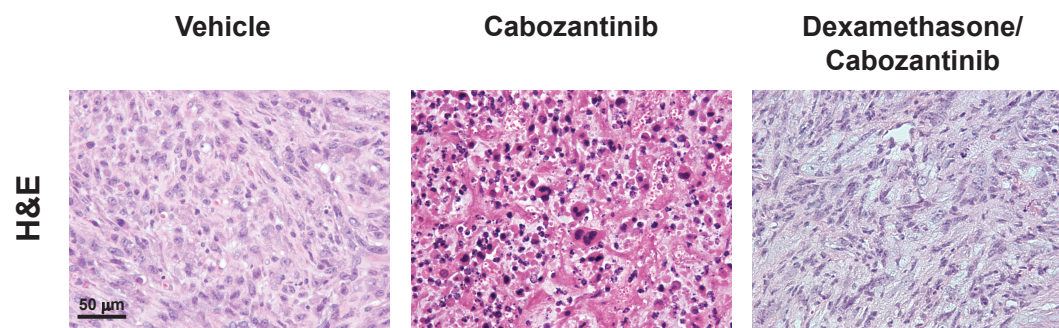

Supplementary Figure 8

Supplement: NIHMS859930-supplement-9.pdf [file NIHMS859930-supplement-9.pdf]
